# Supplementary material for: Impact of Camellia japonica Bee Pollen Polyphenols on Hyperuricemia and Gut Microbiota in Potassium Oxonate-Induced Mice
Source: MDPI journal article supplement (doi:10.3390/nu13082665), 2021-07-30
Supplement: s1 [file s1]

Table S1 Primer sequences

| Gene      | Forward primer         | Reverse primer           | bp  |
|-----------|------------------------|--------------------------|-----|
| β-Actin   | GTGACGTTGACATCCGTAAAGA | GTAACAGTCCGCCTAGAAGCAC   | 287 |
| URAT1     | GTGACGTTGACATCCGTAAAGA | GTAACAGTCCGCCTAGAAGCAC   | 93  |
| GLUT9     | GAGATGCTCATTGTGGGACG   | TCACTCCGAACAGGTATGGC     | 220 |
| OAT1      | CACAATGATTCGGCAGACGG   | AGGTATGGAGGGGTAGAAGCTCG  | 109 |
| OCT1      | ACATCCATGTTGCTCTTTTCG  | TTGCTCCATTATCCTTACCG     | 315 |
| ABCG2     | ATGTTGTGATGGGCACTCTGAC | TATCCACACAGGGAAAGTCCTACT | 210 |
| TLR4      | CCTGGACTTGGACCTCAG     | GGACTGAAAGCTGCACATC      | 156 |
| MYD88     | TCGCGCATCGGACAAACG     | GCAATGGACCAGACACAGGT     | 288 |
| NF-κB     | AGTTGAGGGGACTTTCCCAGGC | GATTCGAGTATTAGTTCATGGA   | 132 |
| NLRP3     | AAGGAAGTGGACTGCGAGAA   | ACGTTTCGTCCTTCCTTCCTT    | 110 |
| ASC       | GTGGGTGGCTTTCCTTGATT   | TTGTCTTGGCTGGTGGTCTCT    | 229 |
| Caspase-1 | AACTGGAGCTGAGGTTGACA   | TCAGAGGTCTTGTGCTC TGG    | 147 |

Table S2 Effect of CPE-E on the relative abundance (%) at the phylum level of gut microbiota

| Phylum-level           | Group I                  | Group II                 | Group III                 | Group IV                 | Group V                   |
|------------------------|--------------------------|--------------------------|---------------------------|--------------------------|---------------------------|
| Microorganisms         |                          |                          |                           |                          |                           |
| <i>Firmicutes</i>      | 51.25±13.47 <sup>b</sup> | 78.98±19.54 <sup>a</sup> | 64.06±15.33 <sup>ab</sup> | 52.08±14.35 <sup>b</sup> | 63.62±17.68 <sup>ab</sup> |
| <i>Bacteroidetes</i>   | 31.20±8.57 <sup>a</sup>  | 14.75±4.35 <sup>b</sup>  | 28.74±6.12 <sup>a</sup>   | 32.10±7.43 <sup>a</sup>  | 17.68±4.67 <sup>b</sup>   |
| <i>Actinobacteria</i>  | 6.79±2.21 <sup>a</sup>   | 2.52±1.36 <sup>b</sup>   | 1.89±1.74 <sup>b</sup>    | 8.67±3.59 <sup>a</sup>   | 8.18±3.42 <sup>a</sup>    |
| <i>Proteobacteria</i>  | 7.27±2.16 <sup>a</sup>   | 1.73±1.02 <sup>b</sup>   | 2.93±1.97 <sup>b</sup>    | 2.37±1.71 <sup>b</sup>   | 5.96±2.33 <sup>a</sup>    |
| <i>TM7</i>             | 2.01±0.92 <sup>a</sup>   | 0.85±0.24 <sup>b</sup>   | 1.06±1.34 <sup>b</sup>    | 2.16±1.38 <sup>a</sup>   | 2.46±1.09 <sup>a</sup>    |
| <i>Tenericutes</i>     | 0.51±0.33 <sup>a</sup>   | 0.48±0.28 <sup>a</sup>   | 0.47±0.34 <sup>a</sup>    | 0.50±0.27 <sup>a</sup>   | 0.74±0.53 <sup>a</sup>    |
| <i>Deferribacteres</i> | 0.39±0.33 <sup>b</sup>   | 0.35±0.31 <sup>b</sup>   | 0.25±0.17 <sup>b</sup>    | 1.30±0.85 <sup>a</sup>   | 0.57±0.36 <sup>b</sup>    |
| <i>Cyanobacteria</i>   | 0.21±0.20 <sup>a</sup>   | 0.15±0.13 <sup>a</sup>   | 0.24±0.22 <sup>a</sup>    | 0.37±0.33 <sup>a</sup>   | 0.43±0.23 <sup>a</sup>    |
| <i>Nitrospirae</i>     | 0.16±0.15 <sup>a</sup>   | 0.00±0.00 <sup>a</sup>   | 0.13±0.08 <sup>a</sup>    | 0.22±0.21 <sup>a</sup>   | 0.12±0.11 <sup>a</sup>    |
| <i>[Thermi]</i>        | 0.00±0.00 <sup>a</sup>   | 0.00±0.00 <sup>a</sup>   | 0.00±0.00 <sup>a</sup>    | 0.10±0.06 <sup>a</sup>   | 0.00±0.00 <sup>a</sup>    |
| <i>others</i>          | 0.21±0.19 <sup>a</sup>   | 0.19±0.06 <sup>a</sup>   | 0.23±0.09 <sup>a</sup>    | 0.13±0.05 <sup>a</sup>   | 0.24±0.13 <sup>a</sup>    |

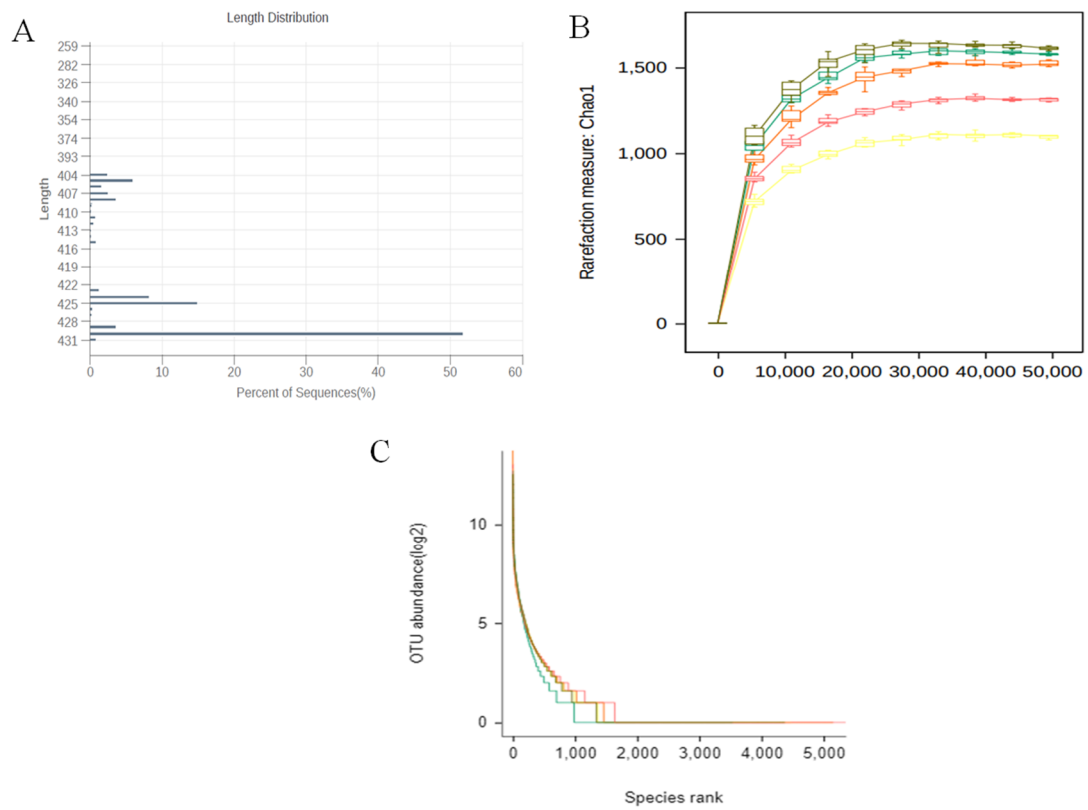

**Figure S1** DNA sequencing number and length (A), rarefaction curve (B), rank abundance curve (C)
